# Supplementary material
Source: PubMed Central journal article supplement (PMC2937961)
Supplement: supp_M110.141176_jbc.M110.141176-1.pdf [file supp_M110.141176_jbc.M110.141176-1.pdf]

## SUPPLEMENTAL MATERIAL

### A MINIMAL CYSTEINE MOTIF REQUIRED TO ACTIVATE THE SKOR K<sup>+</sup> CHANNEL OF *ARABIDOPSIS* BY THE REACTIVE OXYGEN SPECIES H<sub>2</sub>O<sub>2</sub>

Carlos Garcia-Mata, Jianwen Wang, Pawel Gajdanowicz, Wendy Gonzalez, Adrian Hills, Naomi Donald, Janin Riedelsberger, Anna Amtmann, Ingo Dreyer and Michael R. Blatt

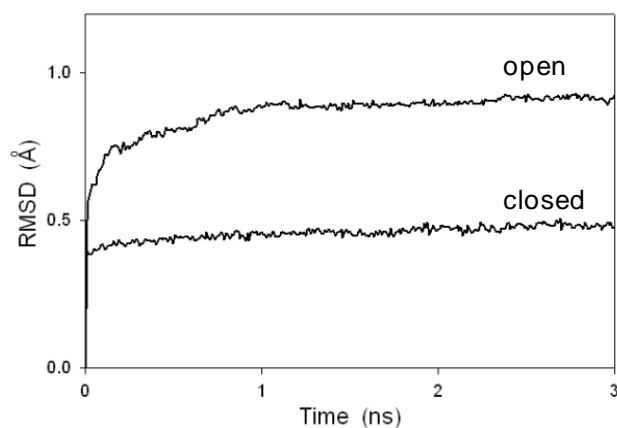

Fig. S1. Equilibration of molecular dynamic simulations for SKOR in the open and closed conformations. Root mean squared deviation (RMSD) calculated with the VMD trajectory tool (1) using  $\alpha$ -C atoms to confirm equilibration over a 3 ns period.

1. Humphrey, W., Dalke, A., and Schulten, K. (1996) *Journal of Molecular Graphics* **14**, 33-48
